# Supplementary material
Source: publisher figshare collection journal article supplement (https://sage.figshare.com/ndownloader/files/15235604)
Supplement: Supplementary file 1 [file 15235604]

## Supplemental Appendix B

### Best fitting structural equation model results of organizational justice and coworker dynamics on trust and respect (standardized coefficients reported, clustered by school)

|                                   | Pattern Coefficients     |                         |
|-----------------------------------|--------------------------|-------------------------|
|                                   | Standardized coefficient | 95% Confidence Interval |
| <b>Direct Effects</b>             |                          |                         |
| <u>Peer Interpersonal Justice</u> |                          |                         |
| Distributive Justice Principal    | 0.123                    | -0.032, 0.277           |
| Interpersonal Justice Principal   | 0.228                    | -0.105, 0.561           |
| Procedural Justice Principal      | -0.043                   | -0.352, 0.265           |
| <u>Work Communication</u>         |                          |                         |
| Distributive Justice Principal    | 0.146                    | -0.082, 0.374           |
| Interpersonal Justice Principal   | -0.145                   | -0.417, 0.127           |
| Procedural Justice Principal      | 0.291**                  | 0.125, 0.458            |
| <u>Collective Responsibility</u>  |                          |                         |
| Distributive Justice Principal    | 0.185*                   | 0.033, 0.337            |
| Interpersonal Justice Principal   | 0.182                    | -0.082, 0.446           |
| Procedural Justice Principal      | 0.129                    | -0.252, 0.510           |
| <u>Trust</u>                      |                          |                         |
| Peer Interpersonal Justice        | 0.326***                 | 0.240, 0.412            |
| Work Communication                | 0.182***                 | 0.081, 0.282            |
| Collective Responsibility         | 0.616***                 | 0.426, 0.807            |
| Teacher Experience                | 0.060                    | -0.007, 0.127           |
| Female                            | -0.027                   | -0.188, 0.133           |
| Black                             | -0.174*                  | -0.317, -0.031          |
| Distributive Justice Principal    | -0.040                   | -0.127, 0.048           |
| Interpersonal Justice Principal   | -0.039                   | -0.149, 0.070           |
| Procedural Justice Principal      | -0.062                   | -0.205, 0.081           |
| <u>Respect</u>                    |                          |                         |
| Peer Interpersonal Justice        | 0.338***                 | 0.238, 0.439            |
| Work Communication                | 0.069                    | -0.072, 0.210           |
| Collective Responsibility         | 0.552***                 | 0.281, 0.823            |
| Teacher Experience                | 0.049                    | -0.010, 0.108           |
| Female                            | -0.005                   | -0.114, 0.104           |
| Black                             | -0.082*                  | -0.154, -0.010          |

|                                 |        |               |
|---------------------------------|--------|---------------|
| Distributive Justice Principal  | -0.113 | -0.232, 0.006 |
| Interpersonal Justice Principal | -0.030 | -0.114, 0.053 |
| Procedural Justice Principal    | -0.020 | -0.130, 0.090 |

#### **Indirect Effects**

##### Trust

|                                 |        |               |
|---------------------------------|--------|---------------|
| Distributive Justice Principal  | 0.180* | 0.024, 0.337  |
| Interpersonal Justice Principal | 0.160  | -0.025, 0.345 |
| Procedural Justice Principal    | 0.118  | -0.069, 0.306 |

##### Respect

|                                 |         |               |
|---------------------------------|---------|---------------|
| Distributive Justice Principal  | 0.154** | 0.053, 0.254  |
| Interpersonal Justice Principal | 0.168*  | 0.005, 0.330  |
| Procedural Justice Principal    | 0.077   | -0.088, 0.242 |

#### **Total Effects**

##### Peer Interpersonal Justice

|                                 |        |               |
|---------------------------------|--------|---------------|
| Distributive Justice Principal  | 0.123  | -0.019, 0.264 |
| Interpersonal Justice Principal | 0.228* | 0.006, 0.450  |
| Procedural Justice Principal    | -0.043 | -0.270, 0.183 |

##### Work Communication

|                                 |        |               |
|---------------------------------|--------|---------------|
| Distributive Justice Principal  | 0.146  | -0.005, 0.297 |
| Interpersonal Justice Principal | -0.145 | -0.383, 0.092 |
| Procedural Justice Principal    | 0.291* | 0.053, 0.530  |

##### Collective Responsibility

|                                 |        |               |
|---------------------------------|--------|---------------|
| Distributive Justice Principal  | 0.185* | 0.045, 0.325  |
| Interpersonal Justice Principal | 0.182  | -0.039, 0.403 |
| Procedural Justice Principal    | 0.129  | -0.096, 0.354 |

##### Trust

|                                 |          |                |
|---------------------------------|----------|----------------|
| Peer Interpersonal Justice      | 0.326*** | 0.209, 0.442   |
| Work Communication              | 0.182*** | 0.057, 0.306   |
| Collective Responsibility       | 0.616*** | 0.488, 0.744   |
| Teacher Experience              | 0.060    | -0.039, 0.159  |
| Female                          | -0.027   | -0.124, 0.069  |
| Black                           | -0.174** | -0.274, -0.074 |
| Distributive Justice Principal  | 0.141    | -0.037, 0.318  |
| Interpersonal Justice Principal | 0.121    | -0.124, 0.365  |
| Procedural Justice Principal    | 0.056    | -0.193, 0.305  |

| Respect                         |          |               |
|---------------------------------|----------|---------------|
| Peer Interpersonal Justice      | 0.338*** | 0.225, 0.452  |
| Work Communication              | 0.069    | -0.055, 0.193 |
| Collective Responsibility       | 0.552*** | 0.423, 0.681  |
| Teacher Experience              | 0.049    | -0.049, 0.147 |
| Female                          | -0.005   | -0.101, 0.091 |
| Black                           | -0.082   | -0.181, 0.016 |
| Distributive Justice Principal  | 0.041    | -0.108, 0.190 |
| Interpersonal Justice Principal | 0.137    | -0.098, 0.372 |
| Procedural Justice Principal    | 0.057    | -0.183, 0.297 |

\*p< 0 .05 \*\*p<0.01 \*\*\*p<0.001

Note: In the interest of space, measurement effects (i.e., error variances and factor variances and covariances) have been omitted from this table, but are available from authors upon request.
